# Supplementary material for: Imidazolium-based ionic liquid functionalized chiral metal–organic framework as an efficient catalyst for asymmetric catalytic sulfoxidation
Source: Royal Society of Chemistry journal article supplement (doi:10.1039/d4ra07458k), 2025-01-01
Supplement: d4ra07458k1.pdf [file d4ra07458k1.pdf]

## Supporting Information

### **Imidazolium-based ionic liquids functionalized chiral metal-organic framework as efficient catalyst for the asymmetric catalytic sulfoxidation**

Shiye Li<sup>a, b</sup>, Yudan Chai<sup>b</sup> and Jian Zhang<sup>\*b</sup>

<sup>a</sup> School of Chemical Engineering, Shanxi Institute of Science and Technology, No.666, Lingqin Line, Jincheng, 048000, China.

<sup>b</sup> School of Chemistry and Chemical Engineering, Shanxi University, Taiyuan, 030006 China.

\*Corresponding authors: [zhangjian@sxu.edu.cn](mailto:zhangjian@sxu.edu.cn)

## Contents

1. Synthetic details of ionic liquid-functionalized IL-Ti(salen)-derived dicarboxylic linker.
2. Synthetic details of Ti(salen)-derived dicarboxylic linker without ionic liquid modification.
3. Identification of the intermediates and asymmetric oxidation product.

4.

References

## 1 **1. Preparation of ionic liquid-functionalized *IL*-Ti(salen)-derived dicarboxylic** 2 **linkers (Ln=1, 2)**

3 Ionic liquid-functionalized salen-derived dicarboxylic linkers of *IL*-Ti(salen)-n (Ln=1, 2) were  
4 synthesized by Schiff base condensation reactions between (R, R)-cyclohexanediamine and  
5 corresponding 3-(tert-butyl)-2-hydroxybenzaldehyde derivatives with pendant ionic liquid  
6 functionalised carboxylic acid groups (Ln=1, 2), followed by metalation with Ti(O<sup>i</sup>Pr)<sub>4</sub> to afford *IL*-  
7 Ti(salen)-n (Ln=1, 2) (Scheme S1). The 3-(tert-butyl)-2-hydroxybenzaldehyde derivatives were  
8 synthesized by carbon-nitrogen coupling reaction between the 3-(tert-butyl)-5-(chloromethyl)-2-  
9 hydroxybenzaldehyde and imidazole esters, followed by hydrolysis of the esters.<sup>1</sup> The specific  
10 experimental steps are as follows: firstly, the 1H-imidazole-1-carboxylate (5.0 mmol) in toluene (25  
11 mL) was mixed with 3-tert-butyl-5-chloromethyl-2-hydroxy-benzaldehyde (5.5 mmol, 1.13 g) in  
12 toluene (25 mL) under Ar atmosphere. The mixture was refluxed for 48 h and then concentrated in  
13 vacuum. The crude product was washed with ethyl acetate (15 × 3 mL) to remove the unreacted 1H-  
14 imidazole-1-carboxylate and 3-tert-butyl-5-chloromethyl-2-hydroxy-benzaldehyde. After being  
15 dried in vacuo, the compound (A<sub>1</sub>) was obtained as a yellow oily liquid. A<sub>1</sub> (n=1) Calc. for  
16 (C<sub>17</sub>H<sub>21</sub>ClN<sub>2</sub>O<sub>4</sub>): C: 57.87, H: 6.00, Cl: 10.05, N: 7.94, O: 18.14%. Found: C: 57.80, H: 6.12, Cl:  
17 10.01, N: 7.96, O: 18.10%.

18 Next, a mixture of A<sub>1</sub> (12.8 mmol), 6 M NaOH solution (80 mL) and EtOH (150 mL) were added  
19 sequentially to a 250 mL round-bottomed flask and the mixture was refluxed at 80 °C for 24 h. After  
20 removing EtOH in vacuo, the residue was diluted with H<sub>2</sub>O and washed with CH<sub>2</sub>Cl<sub>2</sub> for 3 times.  
21 pH value of the solution was adjusted to 3 by the addition of concentrated HCl. The obtained  
22 suspension was filtered. Filter cake was washed with water (10 mL × 3) and then dried in vacuo at  
23 80 °C overnight, yielding intermediates as the brown solid. The brown intermediates, (1R, 2R)-  
24 cyclohexane-1,2-diamine (0.39 g, 3.4 mmol) and EtOH (90 mL) were mixed sequentially and added  
25 to the reaction flask under Ar atmosphere. The reaction mixture was stirred at 80 °C for 24 h and  
26 cooled to room temperature. The resulting solid was collected by filtration, washed with small  
27 amount of EtOH and dried in air. Finally, the above obtained solids, Ti(O<sup>i</sup>Pr)<sub>4</sub> (0.06 g, 0.22 mmol)  
28 and CH<sub>2</sub>Cl<sub>2</sub> (30 mL) were added to a 3-necked round-bottom flask under Ar atmosphere, and stirred  
29 at room temperature for 12 h. The resulting yellow solid was dissolved in dichloromethane (10 mL),

1 and treated with water (2 mL) to remove any traces of TiO<sub>2</sub> by filtration. The product was dried in  
 2 vacuum at 40 °C overnight, giving yellow powders of *IL*-Ti(salen)-derived dicarboxylic linkers (L<sub>1</sub>).  
 3 The typical *IL*-Ti(salen) linker (L<sub>1</sub>) Anal (%). Calc. for (C<sub>44</sub>H<sub>60</sub>C<sub>12</sub>N<sub>6</sub>O<sub>8</sub>Ti): C: 57.46, H: 6.58, Cl:  
 4 7.71, N: 9.14, O: 13.92, Ti: 5.20. Found: C: 57.43, H: 6.61, Cl: 7.68, N: 9.19, O: 13.85, Ti: 5.28.  
 5 FT-IR (KBr):  $\gamma_{\text{max}}/\text{cm}^{-1}$  3431, 2964, 2858, 1739, 1650, 1443, 1363, 1227, 1078, 1019, 889, 815,  
 6 754, 692, 646, 551. The synthesis of L<sub>2</sub> is similar to that of L<sub>1</sub>.

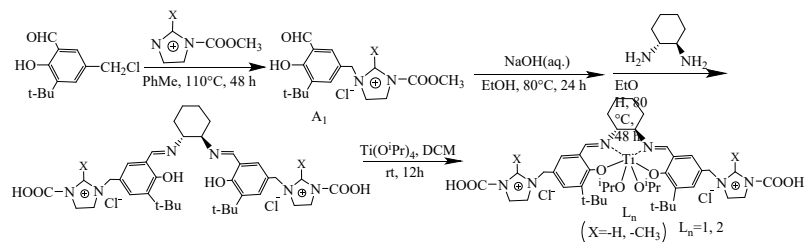

7  
 8 **Scheme S1** The synthesis of *IL*-Ti(salen)-derived dicarboxylic linkers (L<sub>n</sub>=1, 2)

## 9 **2. Preparation of Ti(salen)-derived dicarboxylic linker without ionic liquid** 10 **modification**

11 Ti(salen)-derived dicarboxylic linker was synthesized by Schiff base condensation reactions  
 12 between (R, R)-cyclohexanediamine and corresponding 3-(tert-butyl)-2-hydroxybenzaldehyde  
 13 derivatives with pendant proline methyl ester, followed by metalation with Ti(O<sup>i</sup>Pr)<sub>4</sub> to afford  
 14 Ti(salen)-derived dicarboxylic linker (Scheme S2). The 3-(tert-butyl)-2-hydroxybenzaldehyde  
 15 derivatives were synthesized by carbon-nitrogen coupling reaction between the 3-(tert-butyl)-5-  
 16 (chloromethyl)-2-hydroxybenzaldehyde and proline methyl ester, followed by hydrolysis of the  
 17 esters.<sup>2</sup> Firstly, proline methyl ester (0.65g, 5.0 mmol) in toluene (25 mL) was mixed with 3-tert-  
 18 butyl-5-chloromethyl-2-hydroxy-benzaldehyde (1.13 g, 5.5 mmol) in toluene (25 mL) under Ar  
 19 atmosphere. The mixture was refluxed for 48 h and then concentrated in vacuum. The crude product  
 20 was washed with ethyl acetate (15 × 3 mL) to remove the unreacted proline methyl ester and 3-tert-  
 21 butyl-5-chloromethyl-2-hydroxy-benzaldehyde. After being dried in vacuo, the compound (B) was  
 22 obtained as a yellow oily liquid (1.60 g, yield: 90%). B Calc. for (C<sub>18</sub>H<sub>25</sub>NO<sub>4</sub>): C: 67.69, H: 7.89,  
 23 N: 4.39, O: 20.04%. Found: C: 67.67, H: 7.86, N: 4.35, O: 20.01%.

24 Next, a mixture of B ( 4.088 g, 12.8 mmol), 6 M NaOH solution (80 mL) and EtOH (200 mL)  
 25 was refluxed for 24 h. After removing EtOH in vacuo, the residue was diluted with H<sub>2</sub>O and washed  
 26 with CH<sub>2</sub>Cl<sub>2</sub> for 3 times. pH value of the solution was adjusted to 3 by the addition of concentrated  
 27 HCl. The obtained suspension was filtered, and filter cake was washed with water (10 mL × 3) and  
 28 then dried in vacuo at 80 °C overnight, yielding intermediate as the brown solid (3.88 g, yield: 95%).  
 29 (1R, 2R)-cyclohexane-1,2-diamine (0.39 g, 3.4 mmol) in EtOH (40 mL) was mixed with brown  
 30 intermediate (2.077 g, 6.8 mmol) in EtOH (45 mL) under Ar atmosphere. The reaction mixture was

1 stirred at 80 °C for 24 h and cooled to room temperature. The resulting solid was collected by  
 2 filtration, washed with small amount of EtOH and dried in air. Finally, the above obtained solid,  
 3  $\text{Ti}(\text{O}^i\text{Pr})_4$  (0.06 g, 0.22 mmol) and  $\text{CH}_2\text{Cl}_2$  (30 mL) were added to a three-necked round-bottom flask  
 4 under Ar atmosphere. The mixture was stirred at room temperature for 12 h. The resulting yellow  
 5 solid was dissolved in dichloromethane (10 mL), and treated with water (2 mL) to remove any traces  
 6 of  $\text{TiO}_2$  by filtration. The product was dried in vacuum at 40 °C overnight, giving yellow powders  
 7 of Ti(salen)-derived dicarboxylic linker. FT-IR spectrum for Ti(salen) linker:  $\gamma_{\text{max}}/\text{cm}^{-1}$  3431,  
 8 2964, 2858, 1739, 1650, 1443, 1376, 1294, 1214, 1078, 903, 876, 782, 646, 551.

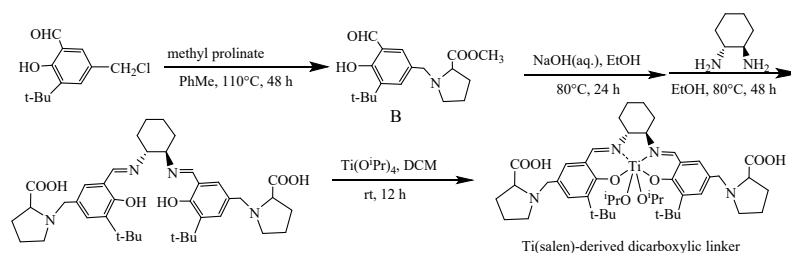

9  
10

**Scheme S2** The synthesis of Ti(salen)-derived dicarboxylic linker

### 11 3. Identification of the intermediates and asymmetric oxidation product.

#### 12 3.1 Characterization of $\text{A}_1$

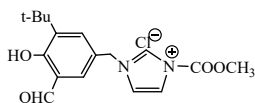

13

14 The crude product was purified by chromatography on silica gel (petroleum ether/ethyl acetate,  
 15 1: 1). Depurated product  $\text{A}_1$  was identified by  $^1\text{H}$  NMR and  $^{13}\text{C}$  NMR spectrum (see Fig. S1 and 2).  
 16  $^1\text{H}$  NMR (500 MHz,  $\text{CDCl}_3$ )  $\delta$  (ppm): 11.86 (s, 1 H, Ar-OH), 9.84 (s, 1 H, Ar-CHO), 7.63-7.37 (s,  
 17 2 H, ArH), 7.17-7.14 (m, 3 H, N-CH=CH-N), 6.94 (s, 1 H, N-CH=N), 5.13 (s, 2 H, Ar- $\text{CH}_2$ ), 1.42  
 18 (s, 12 H, Ar- $\text{C}(\text{CH}_3)_3$  and  $\text{OCH}_3$ ).  $^{13}\text{C}$  NMR (500 MHz,  $\text{CDCl}_3$ )  $\delta$  (ppm): 196.79, 161.13, 139.51,  
 19 137.22, 133.05, 130.29, 129.72, 126.80, 120.47, 119.13, 77.35, 77.10, 76.84, 50.21, 35.00, 34.94,  
 20 29.07.

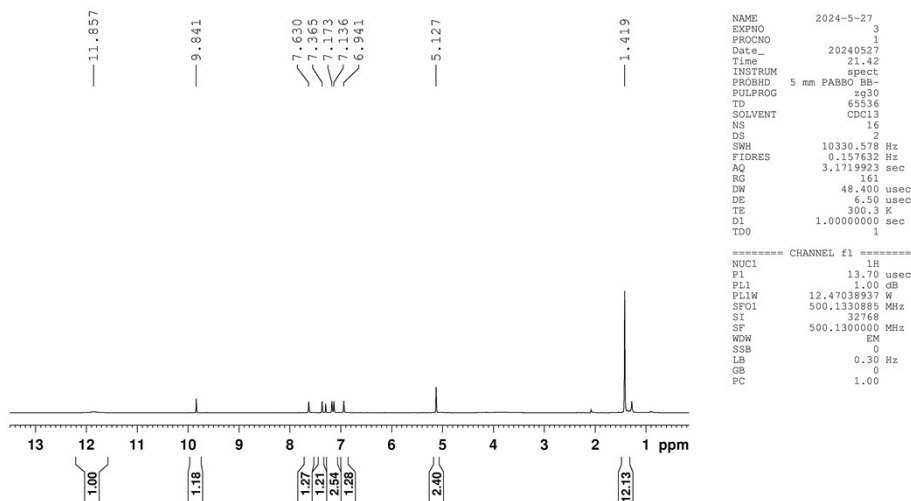

21



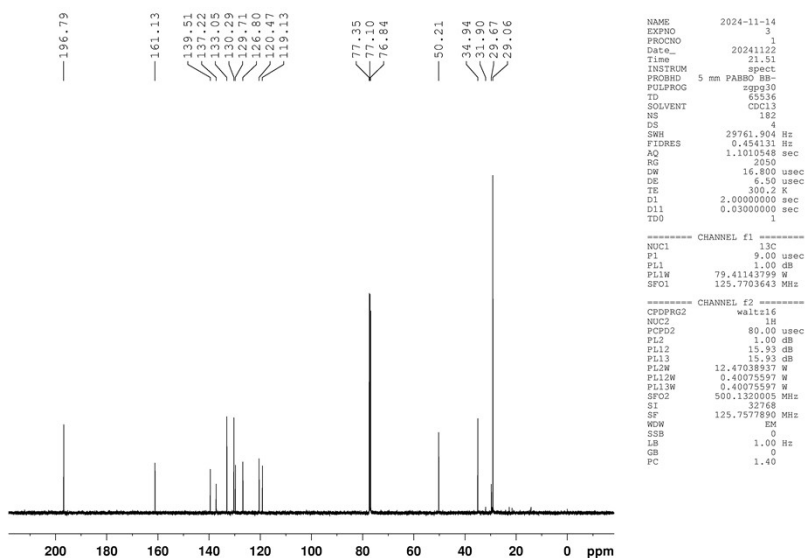

Fig. S4 <sup>13</sup>C NMR of B

1  
2

### 3.3 Characterization of asymmetric oxidation products

*Methyl phenyl sulfoxide*: The crude product was purified by chromatography on silica gel (petroleum ether/ethyl acetate, 8: 1). The product has been identified by <sup>1</sup>H NMR and <sup>13</sup>C NMR spectrum (see Fig. S5 and 6). <sup>1</sup>H NMR (CDCl<sub>3</sub>, 500 MHz): δ (ppm): 7.98-7.59 (m, 5 H, ArH), 3.08 (s, 3 H, -SCH<sub>3</sub>). <sup>13</sup>C NMR (CDCl<sub>3</sub>, 500 MHz) δ (ppm): 145.73, 131.05, 129.37, 123.51, 43.98. ee was determined by HPLC (*i*-PrOH/*n*-hexane = 2:8 (v/v)); flow rate = 1.0 mL·min<sup>-1</sup>; 25 °C; λ = 254 nm; major enantiomer *t*<sub>R</sub> = 6.06 min and minor enantiomer *t*<sub>S</sub> = 7.37 min (see Fig. S7- S10).

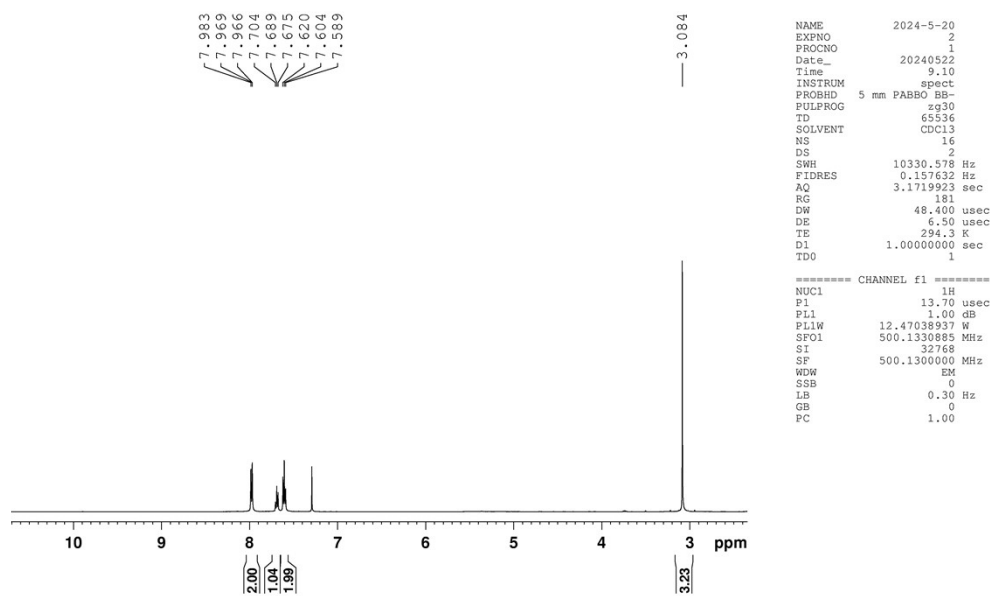

Fig. S5 <sup>1</sup>H NMR of methyl phenyl sulfoxide

10  
11

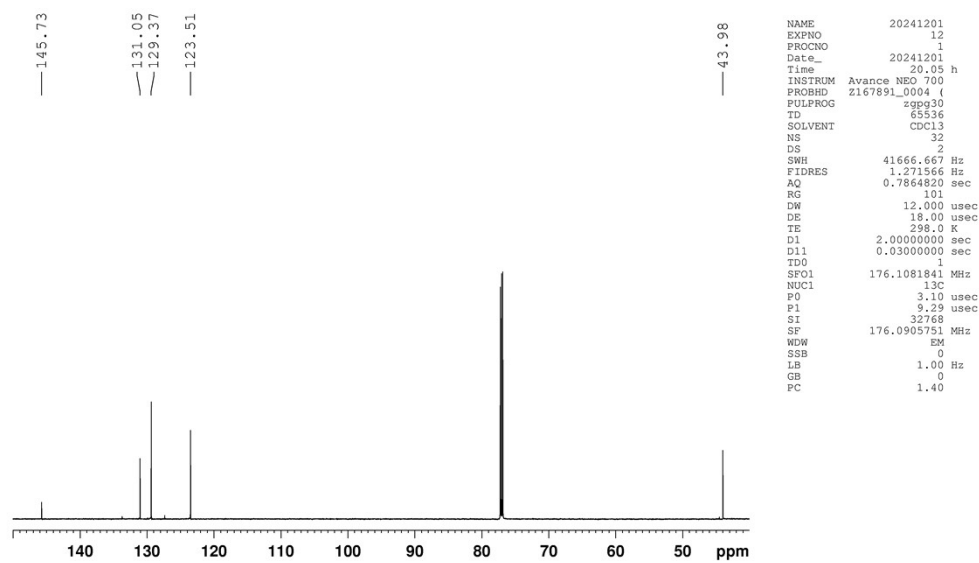

1  
2

Fig. S6  $^{13}\text{C}$  NMR of methyl phenyl sulfoxide

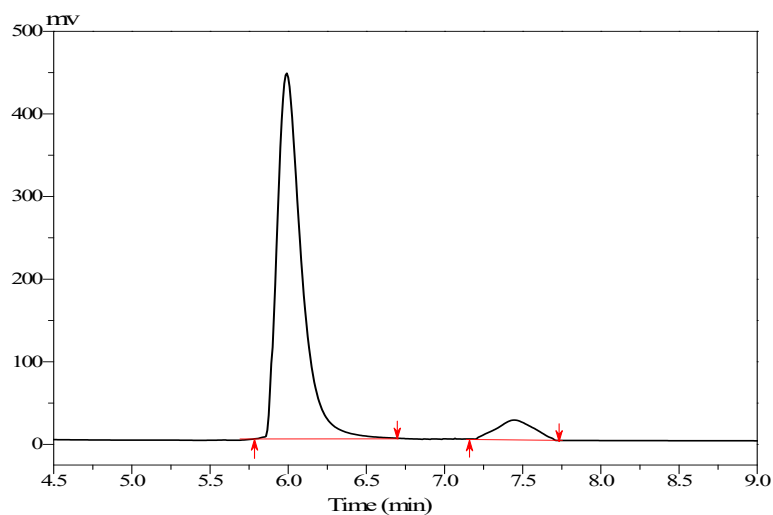

3  
4

Fig. S7 HLPC of methyl phenyl sulfoxide obtained over Ti(salen) complex (ee value 86%)

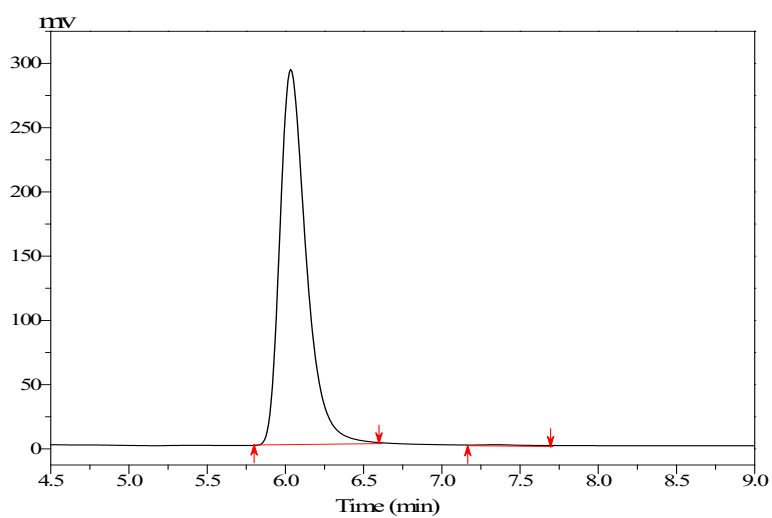

5  
6

Fig. S8 HLPC of methyl phenyl sulfoxide obtained over *IL*-Ti(salen) CMOF-1 (ee value >99%)



1

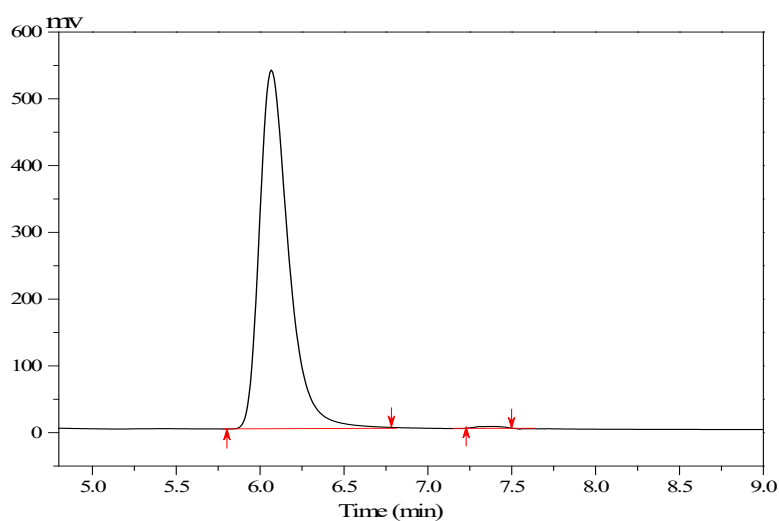

2

3 **Fig. S9** HPLC of methyl phenyl sulfoxide obtained over *IL*-Ti(salen) CMOF-2 (ee value 99%)

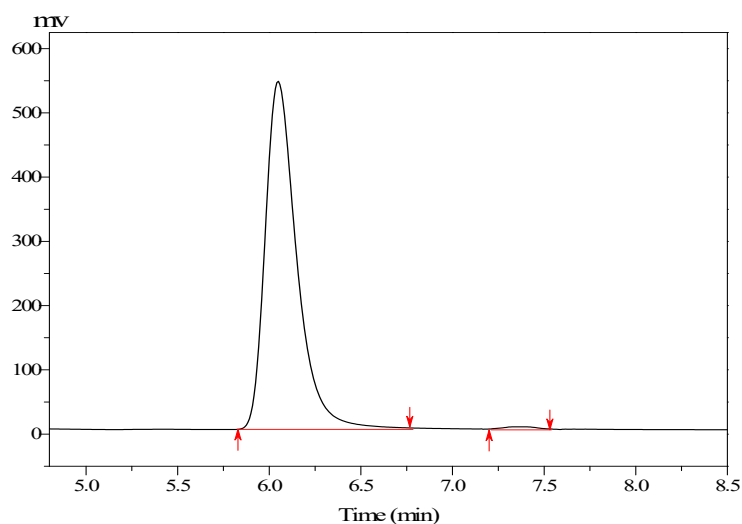

4

5 **Fig. S10** HPLC of methyl phenyl sulfoxide obtained over Ti(salen) CMOF (ee value 98%)

6 *Ethyl phenyl sulfoxide*: The crude product was purified by chromatography on silica gel  
7 (petroleum ether/ethyl acetate, 8: 1). The product has been identified by <sup>1</sup>H NMR and <sup>13</sup>C  
8 NMR spectrum (see Fig. S11 and 12). <sup>1</sup>H NMR (CDCl<sub>3</sub>, 500 MHz): δ (ppm): 7.61-7.49 (m, 5 H,  
9 ArH), 2.92-2.74 (m, 2 H, -CH<sub>2</sub>-CH<sub>3</sub>), 1.20-1.17 (t, 3 H, -CH<sub>2</sub>-CH<sub>3</sub>). <sup>13</sup>C NMR (CDCl<sub>3</sub>, 500 MHz) δ  
10 (ppm): 143.35, 130.94, 129.16, 124.20, 50.32, 5.98. ee was determined by HPLC (*i*-PrOH/*n*-hexane  
11 = 2:8 (v/v)); flow rate = 1.0 mL·min<sup>-1</sup>; 25 °C; λ = 254 nm; major enantiomer *t*<sub>R</sub> = 5.72 min and  
12 minor enantiomer *t*<sub>S</sub> = 7.28 min (see Fig. S13).

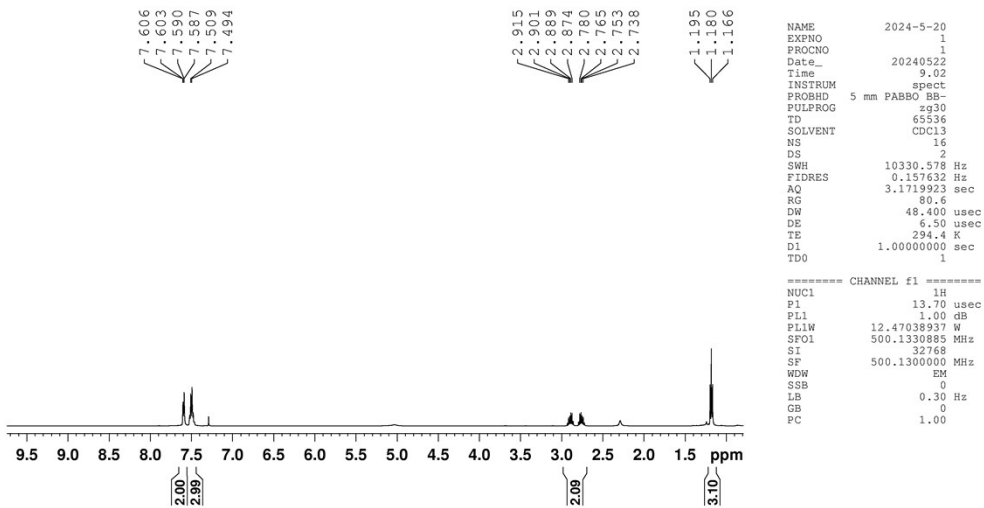

1  
2

Fig. S11 <sup>1</sup>H NMR of ethyl phenyl sulfoxide

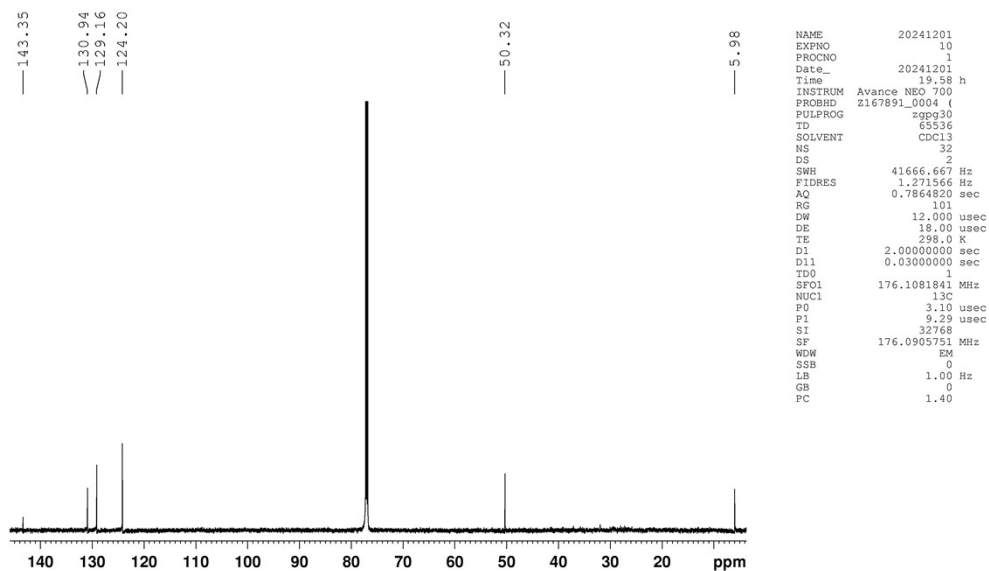

3  
4

Fig. S12 <sup>13</sup>C NMR of ethyl phenyl sulfoxide

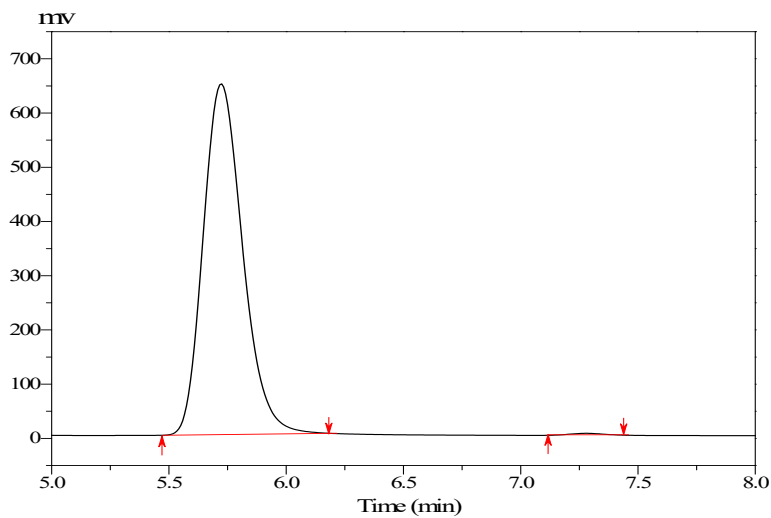

5

1 **Fig. S13** HPLC of ethyl phenyl sulfoxide obtained over *IL-Ti(salen)* CMOF-1 (ee value 99%)  
 2 *n-Butyl phenyl sulfoxide*: The crude product was purified by chromatography on silica gel  
 3 (petroleum ether/ethyl acetate, 10: 1). The product has been identified by <sup>1</sup>H NMR and <sup>13</sup>C NMR  
 4 spectrum (see Fig. S14 and 15). <sup>1</sup>H NMR (CDCl<sub>3</sub>, 500 MHz): δ (ppm): 7.62-7.48 (m, 5 H, ArH),  
 5 2.79-2.76 (m, 2 H, -CH<sub>2</sub>-CH<sub>2</sub>-CH<sub>2</sub>-CH<sub>3</sub>), 1.74-1.24 (m, 4 H, -CH<sub>2</sub>-CH<sub>2</sub>-CH<sub>2</sub>-CH<sub>3</sub>), 0.91-0.88 (t, 3  
 6 H, -CH<sub>2</sub>-CH<sub>2</sub>-CH<sub>2</sub>-CH<sub>3</sub>). <sup>13</sup>C NMR (CDCl<sub>3</sub>, 500 MHz) δ (ppm): 143.35, 130.94, 129.16, 124.20,  
 7 50.12, 26.28, 18.07, 9.73. ee was determined by HPLC (*i*-PrOH/*n*-hexane = 2:8 (v/v)); flow rate =  
 8 1.0 mL·min<sup>-1</sup>; 25 °C; λ = 254 nm; major enantiomer *t*<sub>R</sub> = 5.46 min and minor enantiomer *t*<sub>S</sub> = 6.34  
 9 min (see Fig. S16).

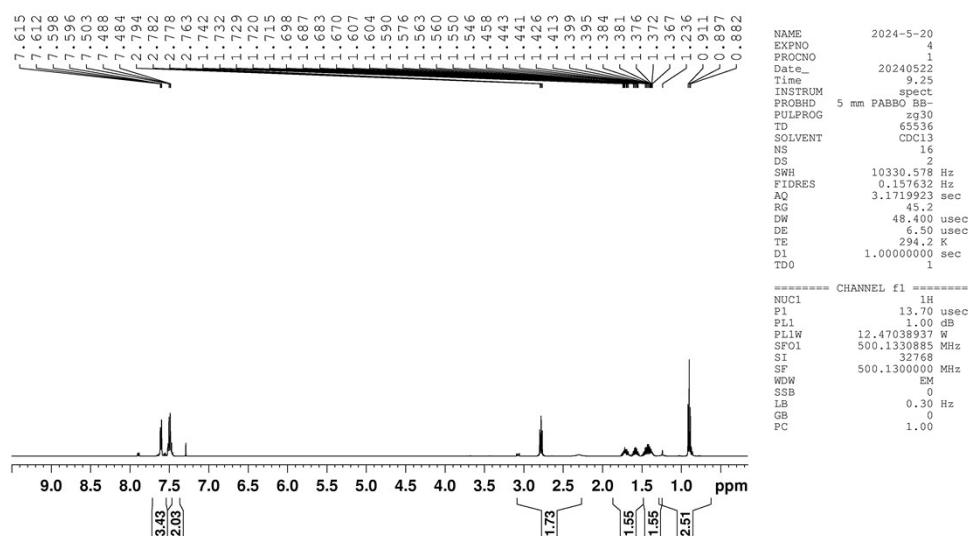

10  
11 **Fig. S14** <sup>1</sup>H NMR of *n*-butyl phenyl sulfoxide

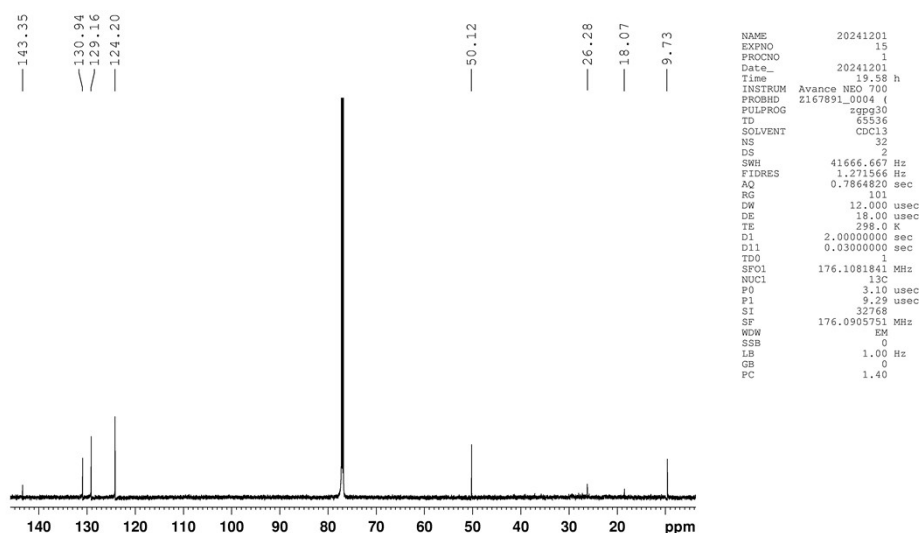

12  
13 **Fig. S15** <sup>13</sup>C NMR of *n*-butyl phenyl sulfoxide

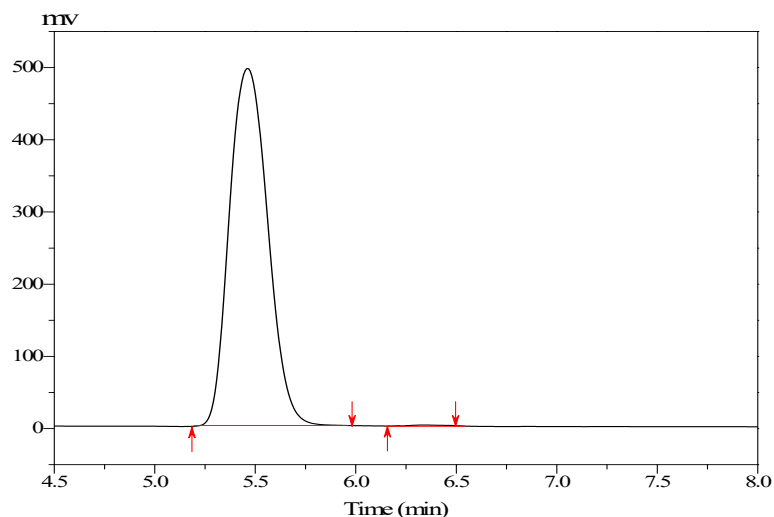

1  
2 **Fig. S16** HPLC of n-butyl phenyl sulfoxide obtained over *IL*-Ti(salen) CMOF-1 (ee value  
3 >99%)

4 *4-Methylphenyl methyl sulfoxide*: The crude product was purified by chromatography on silica  
5 gel (petroleum ether/ethyl acetate, 10: 1). The product has been identified by <sup>1</sup>H NMR and <sup>13</sup>C NMR  
6 spectrum (see Fig. S17 and 18). <sup>1</sup>H NMR (CDCl<sub>3</sub>, 500 MHz): δ (ppm): 7.57-7.35 (m, 4 H, ArH),  
7 2.73 (s, 3 H, S-CH<sub>3</sub>), 2.44 (s, 3 H, Ar-CH<sub>3</sub>). <sup>13</sup>C NMR (CDCl<sub>3</sub>, 500 MHz) δ (ppm): 142.53, 141.54,  
8 130.05, 123.57, 44.01, 29.71. ee was determined by HPLC (*i*-PrOH/n-hexane = 2:8 (v/v)); flow rate  
9 = 1.0 mL·min<sup>-1</sup>; 25 °C; λ = 254 nm; major enantiomer *t*<sub>R</sub> = 9.05 min and minor enantiomer *t*<sub>S</sub> =  
10 16.80 min (see Fig. S19).

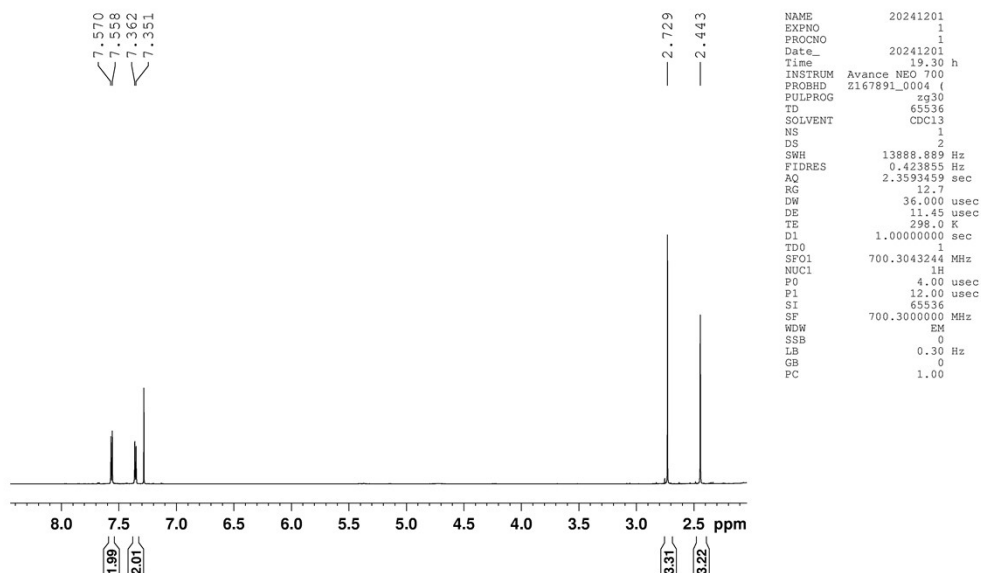

11  
12 **Fig. S17** <sup>1</sup>H NMR of 4-methylphenyl methyl sulfoxide

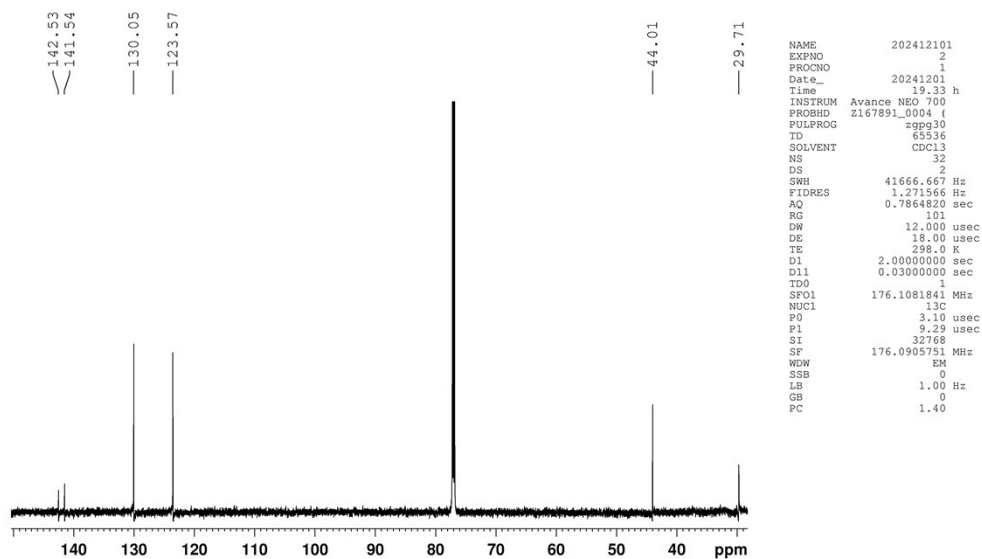

1  
2

**Fig. S18**  $^{13}\text{C}$  NMR of 4-methylphenyl methyl sulfoxide

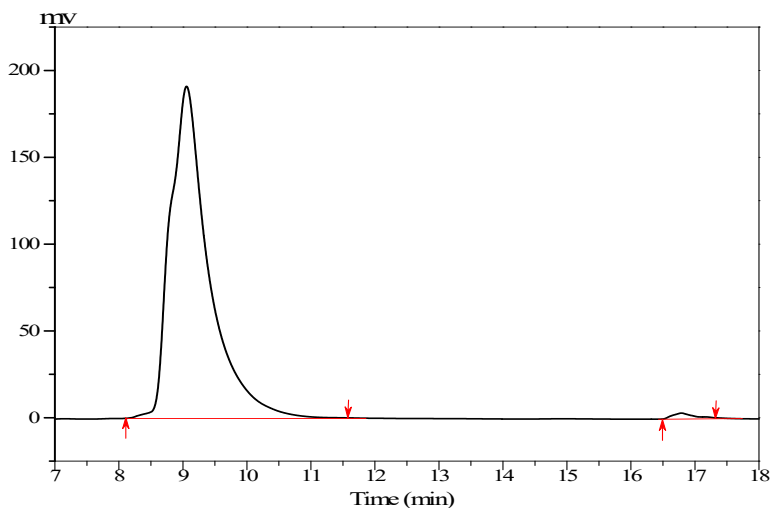

3

**Fig. S19** HPLC of 4-methylphenyl methyl sulfoxide obtained over *IL*-Ti(salen) CMOF-1 (ee value 96%)

4  
5  
6 *4-Methoxyphenyl methyl sulfoxide*: The crude product was purified by chromatography on silica  
7 gel (petroleum ether/ethyl acetate, 10: 1). The product has been identified by  $^1\text{H}$  and  $^{13}\text{C}$  NMR  
8 spectrum (see Fig. S20 and 21).  $^1\text{H}$  NMR ( $\text{CDCl}_3$ , 500 MHz):  $\delta$  (ppm): 7.90-7.04 (m, 4 H, ArH),  
9 3.91 (s, 3 H,  $-\text{OCH}_3$ ), 3.06 (s, 3 H,  $-\text{SCH}_3$ ).  $^{13}\text{C}$  NMR ( $\text{CDCl}_3$ , 500 MHz)  $\delta$  (ppm): 158.70, 133.04,  
10 121.34, 110.56, 55.70, 41.22. ee was determined by HPLC (*i*-PrOH/n-hexane = 1:9 (v/v)); flow rate  
11 =  $0.7 \text{ mL} \cdot \text{min}^{-1}$ ;  $25 \text{ }^\circ\text{C}$ ;  $\lambda = 254 \text{ nm}$ ; major enantiomer  $t_R = 18.19 \text{ min}$  and minor enantiomer  $t_S =$   
12  $20.93 \text{ min}$  (see Fig. S22).

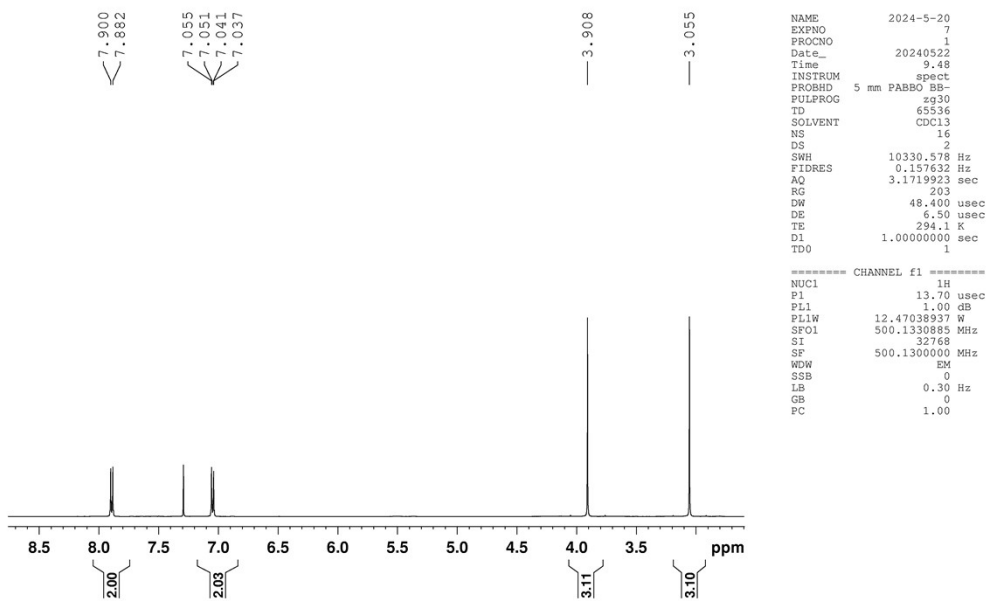

1  
2

Fig. S20 <sup>1</sup>H NMR of 4-methoxyphenyl methyl sulfoxide

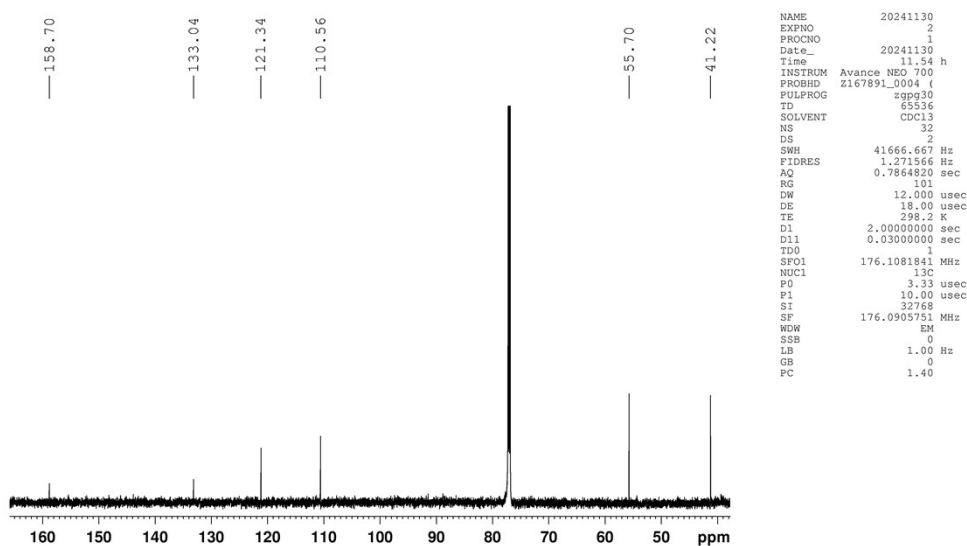

3  
4

Fig. S21 <sup>13</sup>C NMR of 4-methoxyphenyl methyl sulfoxide

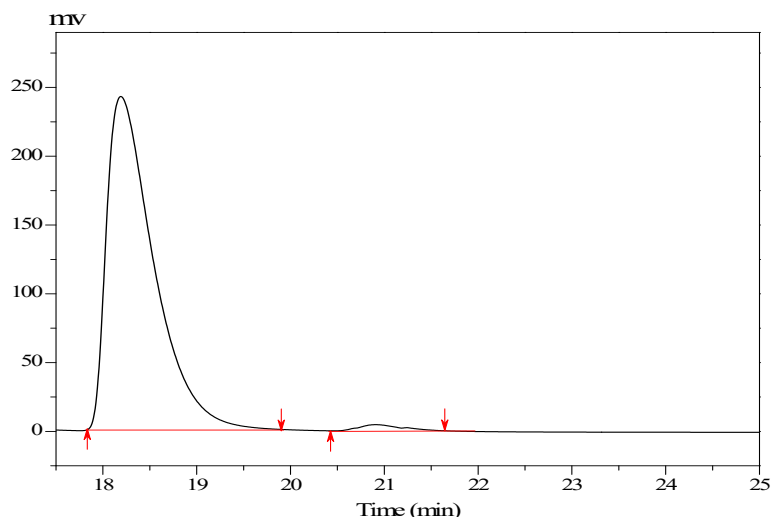

1  
 2 **Fig. S22** HPLC of 4-methoxyphenyl methyl sulfoxide obtained over *IL*-Ti(salen) CMOF-1 (ee  
 3 value 94%)  
 4 *2-Methoxyphenyl methyl sulfoxide*: The crude product was purified by chromatography on silica  
 5 gel (petroleum ether/ethyl acetate, 10: 1). The product has been identified by <sup>1</sup>H and <sup>13</sup>C NMR  
 6 spectrum (see Fig. S23 and 24). <sup>1</sup>H NMR (CDCl<sub>3</sub>, 500 MHz): δ (ppm): 7.78-6.90 (m, 4 H, ArH),  
 7 3.86 (s, 3 H, -OCH<sub>3</sub>), 2.75 (s, 3 H, -SCH<sub>3</sub>). <sup>13</sup>C NMR (500 MHz, CDCl<sub>3</sub>) δ (ppm): 154.82, 133.14,  
 8 131.94, 124.69, 121.74, 110.56, 55.70, 41.22. ee was determined by HPLC (*i*-PrOH/*n*-hexane = 1:9  
 9 (v/v)); flow rate = 0.8 mL·min<sup>-1</sup>; 25 °C; λ = 254 nm; major enantiomer *t*<sub>R</sub> = 19.37 min and minor  
 10 enantiomer *t*<sub>S</sub> = 22.47 min (see Fig. S25).

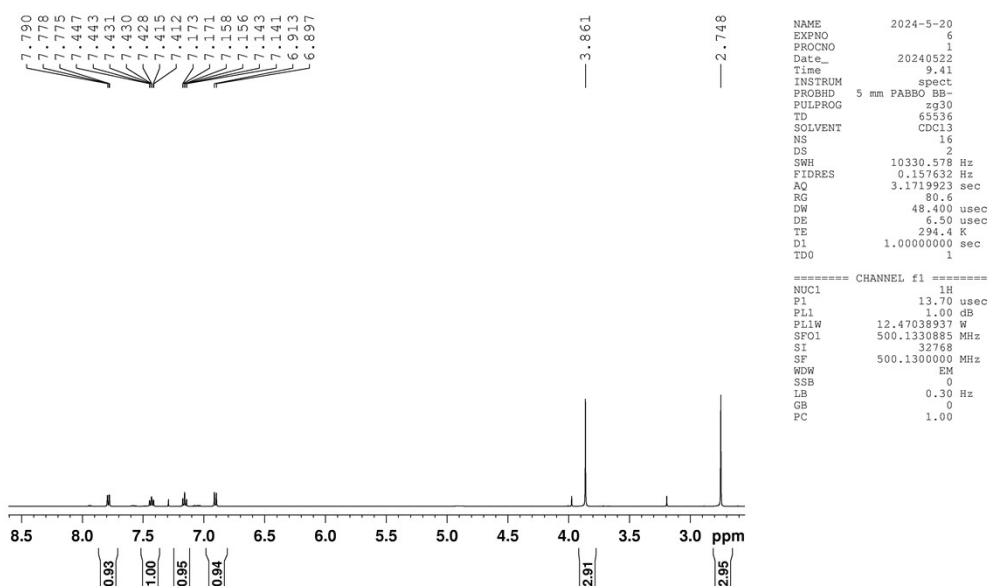

11  
 12 **Fig. S23** <sup>1</sup>H NMR of 2-methoxyphenyl methyl sulfoxide

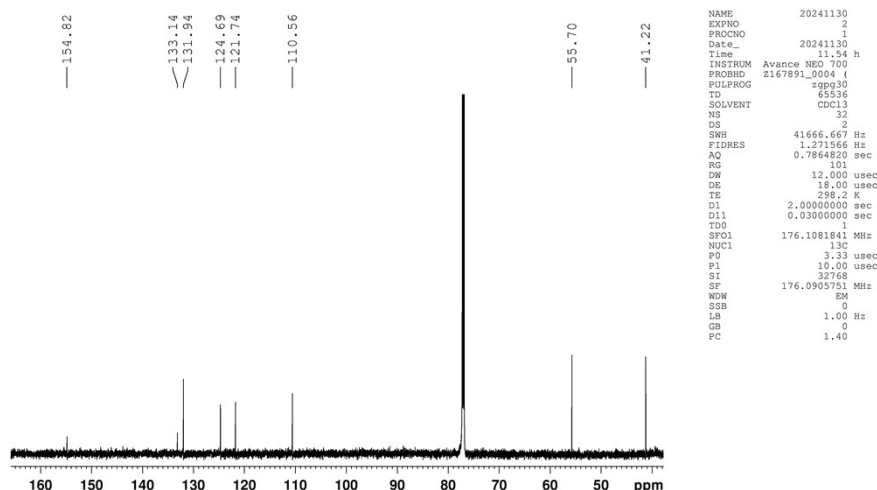

1  
2

**Fig. S24**  $^{13}\text{C}$  NMR of 2-methoxyphenyl methyl sulfoxide

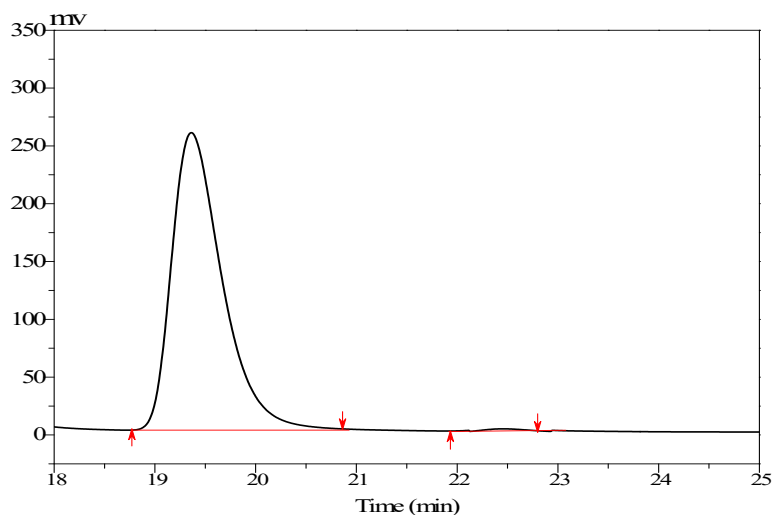

3

**Fig. S25** HPLC of 2-methoxyphenyl methyl sulfoxide obtained over ***IL*-Ti(salen) CMOF-1** (ee value 99%)

4

5  
6 *2-Chlorophenyl methyl sulfoxide*: The crude product was purified by chromatography on silica  
7 gel (petroleum ether/ethyl acetate, 8: 1). The product has been identified by  $^1\text{H}$  and  $^{13}\text{C}$  NMR  
8 spectrum (see Fig. S26 and 27).  $^1\text{H}$  NMR ( $\text{CDCl}_3$ , 500 MHz):  $\delta$  (ppm): 7.98-7.42 (m, 4 H, ArH),  
9 2.85 (s, 3 H,  $-\text{SCH}_3$ ).  $^{13}\text{C}$  NMR (500 MHz,  $\text{CDCl}_3$ )  $\delta$  (ppm): 143.63, 131.99, 129.78, 128.18, 125.36,  
10 44.66. ee was determined by HPLC (*i*-PrOH/n-hexane = 1:9 (v/v)); flow rate =  $1.0 \text{ mL}\cdot\text{min}^{-1}$ ; 25  
11  $^\circ\text{C}$ ;  $\lambda = 254 \text{ nm}$ ; major enantiomer  $t_R = 10.70 \text{ min}$  and minor enantiomer  $t_S = 13.87 \text{ min}$  (see Fig.  
12 S28).



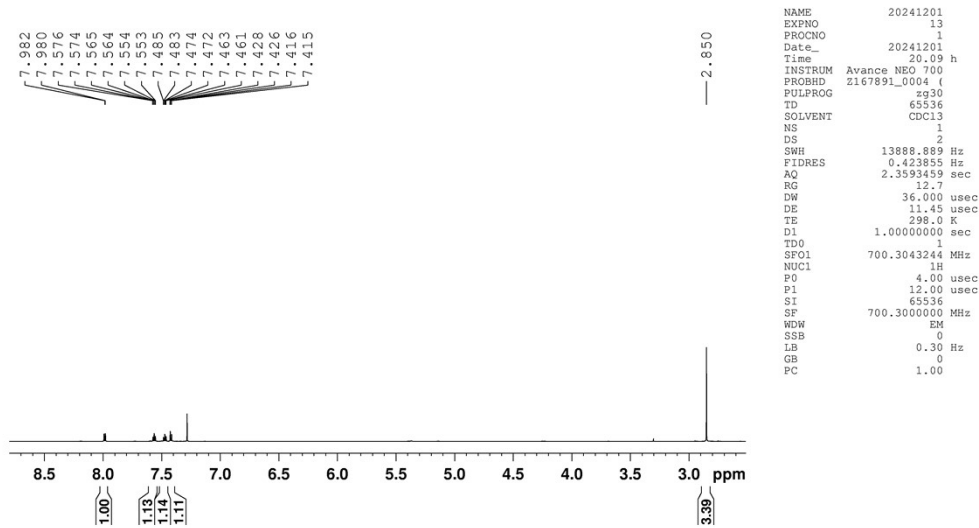

1  
2

Fig. S26 <sup>1</sup>H NMR of 2-chlorophenyl methyl sulfoxide

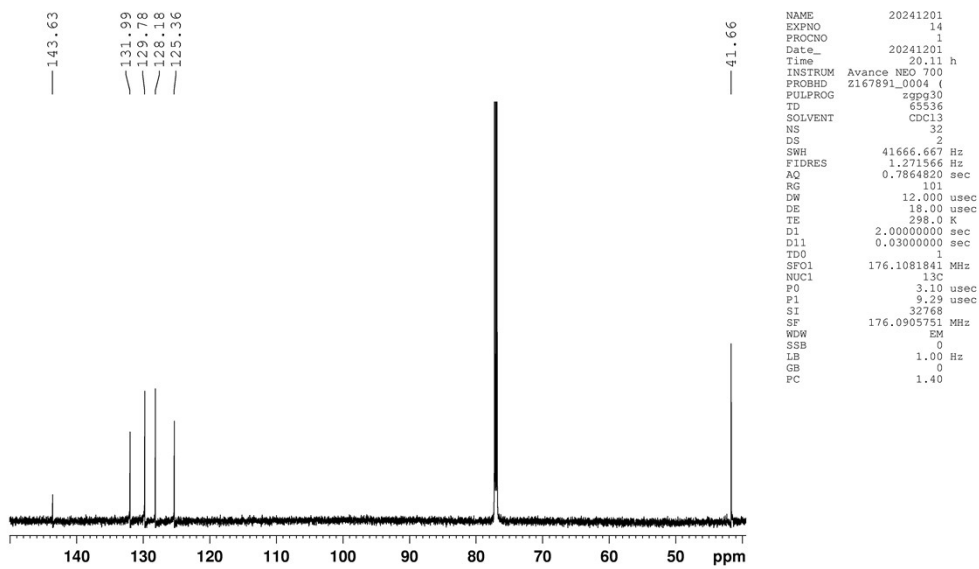

3  
4

Fig. S27 <sup>13</sup>C NMR of 2-chlorophenyl methyl sulfoxide

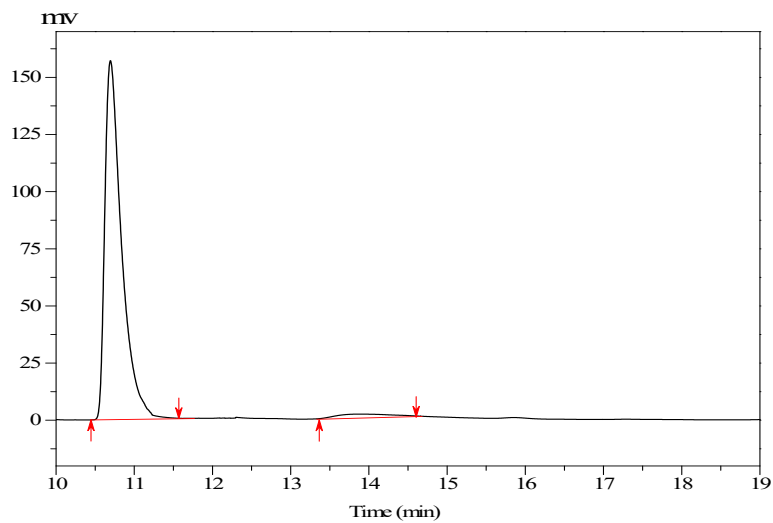

5

1 **Fig. S28** HPLC of 2-chlorophenyl methyl sulfoxide obtained over *IL-Ti(salen)* CMOF-1 (ee  
 2 value 97%)

3 *3-Chlorophenyl methyl sulfoxide*: The crude product was purified by chromatography on silica  
 4 gel (petroleum ether/ethyl acetate, 8: 1). The product has been identified by <sup>1</sup>H and <sup>13</sup>C NMR  
 5 spectrum (see Fig. S29 and 30). <sup>1</sup>H NMR (CDCl<sub>3</sub>, 500 MHz): δ (ppm): 7.52-7.49 (m, 4 H, ArH),  
 6 2.77 (s, 3 H, -SCH<sub>3</sub>). <sup>13</sup>C NMR (500 MHz, CDCl<sub>3</sub>) δ (ppm): 135.76, 131.23, 130.61, 123.68, 121.62,  
 7 44.05. ee was determined by HPLC (*i*-PrOH/*n*-hexane = 1:9 (v/v)); flow rate = 1.1 mL·min<sup>-1</sup>; 25  
 8 °C; λ = 254 nm; major enantiomer *t*<sub>R</sub> = 8.06 min and minor enantiomer *t*<sub>S</sub> = 10.49 min (see Fig.  
 9 S31).

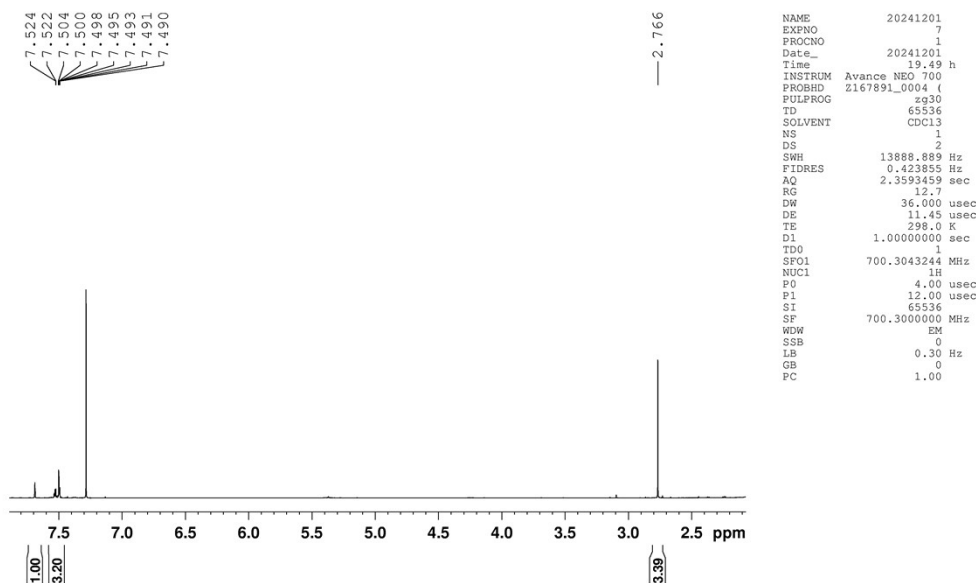

10  
11

**Fig. S29** <sup>1</sup>H NMR of 3-chlorophenyl methyl sulfoxide

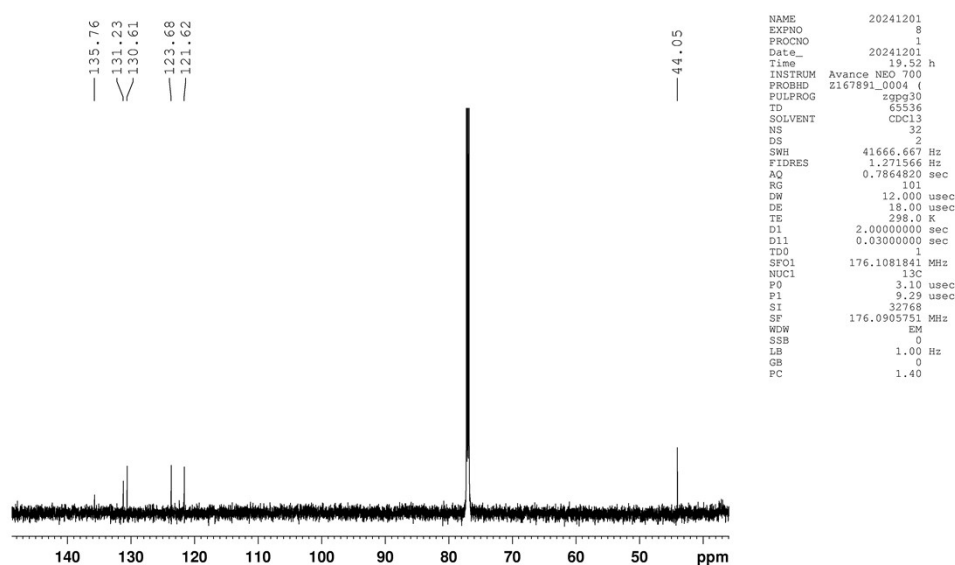

12  
13

**Fig. S30** <sup>13</sup>C NMR of 3-chlorophenyl methyl sulfoxide

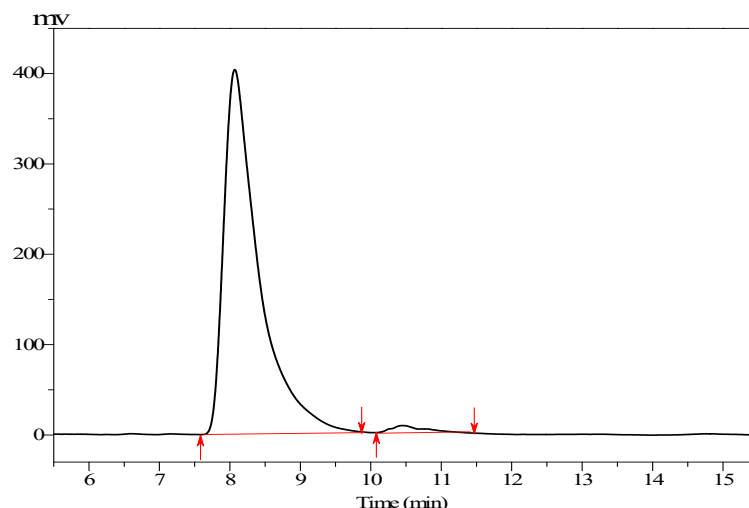

1  
 2 **Fig. S31** HPLC of 3-chlorophenyl methyl sulfoxide obtained over *IL*-Ti(salen) CMOF-1 (ee  
 3 value 95%)  
 4 *3-Bromophenyl methyl sulfoxide*: The crude product was purified by chromatography on silica  
 5 gel (petroleum ether/ethyl acetate, 8: 1). The product has been identified by <sup>1</sup>H and <sup>13</sup>C NMR  
 6 spectrum (see Fig. S32 and 33). <sup>1</sup>H NMR (CDCl<sub>3</sub>, 500 MHz): δ (ppm): 7.82-7.40 (m, 4 H, ArH),  
 7 2.75 (s, 3 H, -SCH<sub>3</sub>). <sup>13</sup>C NMR (500 MHz, CDCl<sub>3</sub>) δ (ppm): 148.03, 134.12, 130.84, 126.49, 123.61,  
 8 122.08, 44.06. ee was determined by HPLC (*i*-PrOH/n-hexane = 2:8 (v/v)); flow rate = 1.1  
 9 mL·min<sup>-1</sup>; 25 °C; λ = 254 nm; major enantiomer *t*<sub>R</sub> = 8.43 min and minor enantiomer *t*<sub>S</sub> = 10.22 min  
 10 (see Fig. S34).

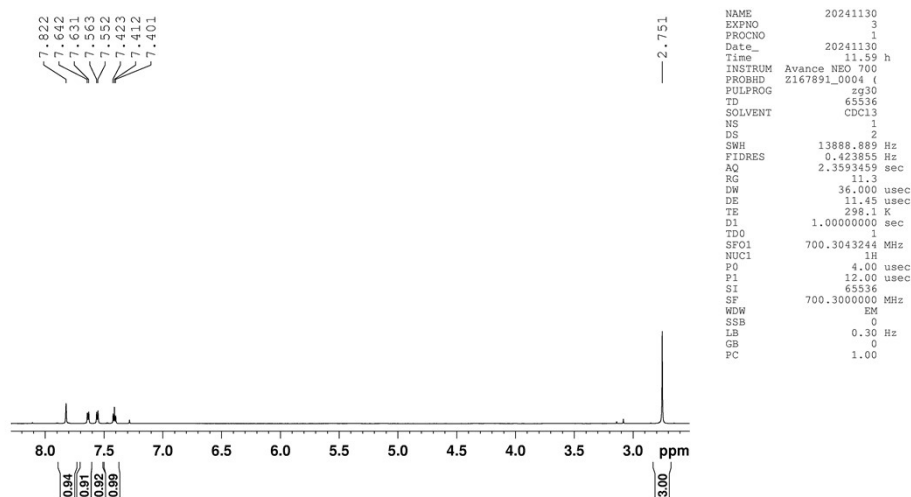

11  
 12 **Fig. S32** <sup>1</sup>H NMR of 3-bromophenyl methyl sulfoxide

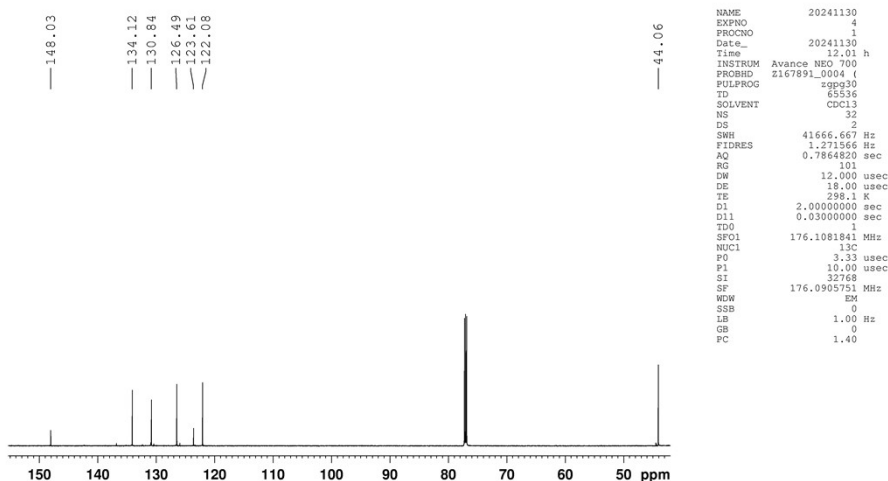

1  
2

**Fig. S33**  $^{13}\text{C}$  NMR of 3-bromophenyl methyl sulfoxide

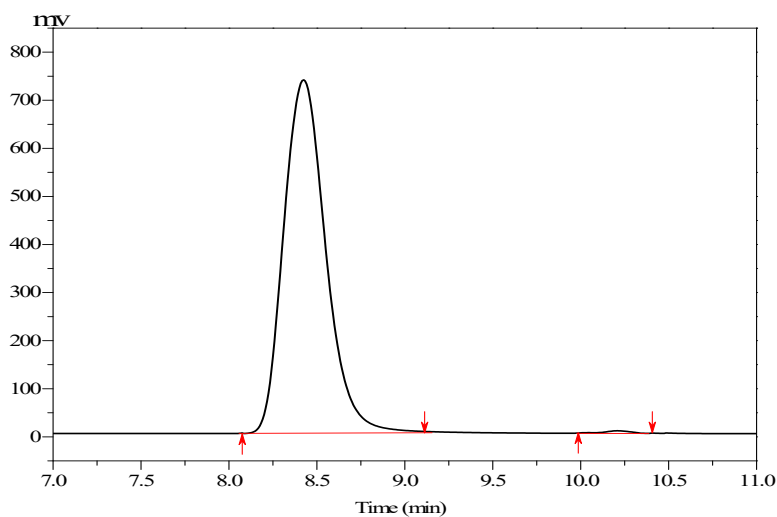

3

**Fig. S34** HPLC of 3-bromophenyl methyl sulfoxide obtained over *IL*-Ti(salen) CMOF-1 (ee value 97%)

4  
5  
6 *4*-Bromophenyl methyl sulfoxide: The crude product was purified by chromatography on silica  
7 gel (petroleum ether/ethyl acetate, 8: 1). The product has been identified by  $^1\text{H}$  and  $^{13}\text{C}$  NMR  
8 spectrum (see Fig. S35 and 36).  $^1\text{H}$  NMR ( $\text{CDCl}_3$ , 500 MHz):  $\delta$  (ppm): 7.71-7.54 (m, 4 H, *ArH*),  
9 2.75 (s, 3 H,  $-\text{SCH}_3$ ).  $^{13}\text{C}$  NMR (500 MHz,  $\text{CDCl}_3$ )  $\delta$  (ppm): 140.07, 130.84, 123.61, 122.08, 44.06.  
10 ee was determined by HPLC (*i*-PrOH/*n*-hexane = 2:8 (v/v)); flow rate =  $1.2 \text{ mL} \cdot \text{min}^{-1}$ ;  $25^\circ\text{C}$ ;  $\lambda =$   
11 254 nm; major enantiomer  $t_R = 8.32 \text{ min}$  and minor enantiomer  $t_S = 10.17 \text{ min}$  (see Fig. S37).

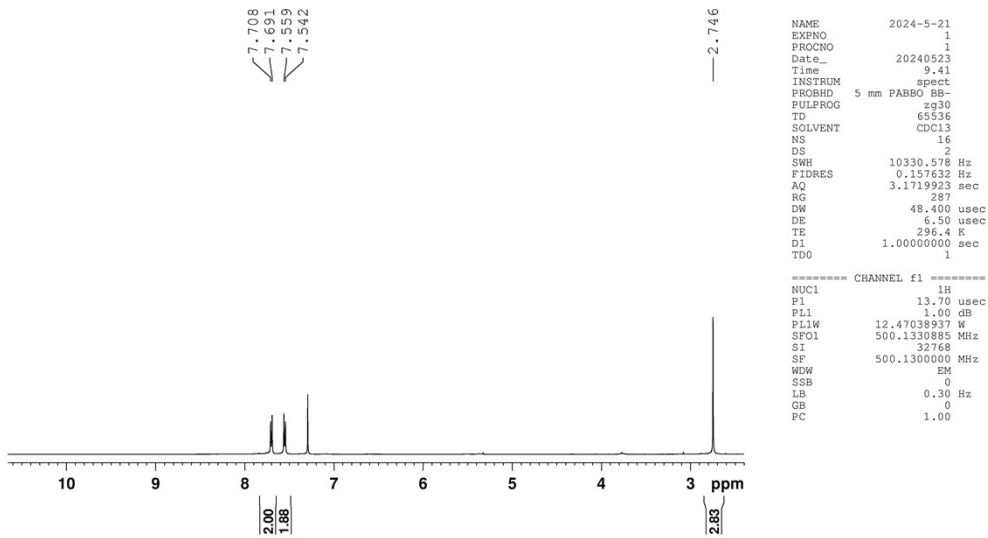

1  
2

Fig. S35 <sup>1</sup>H NMR of 4-bromophenyl methyl sulfoxide

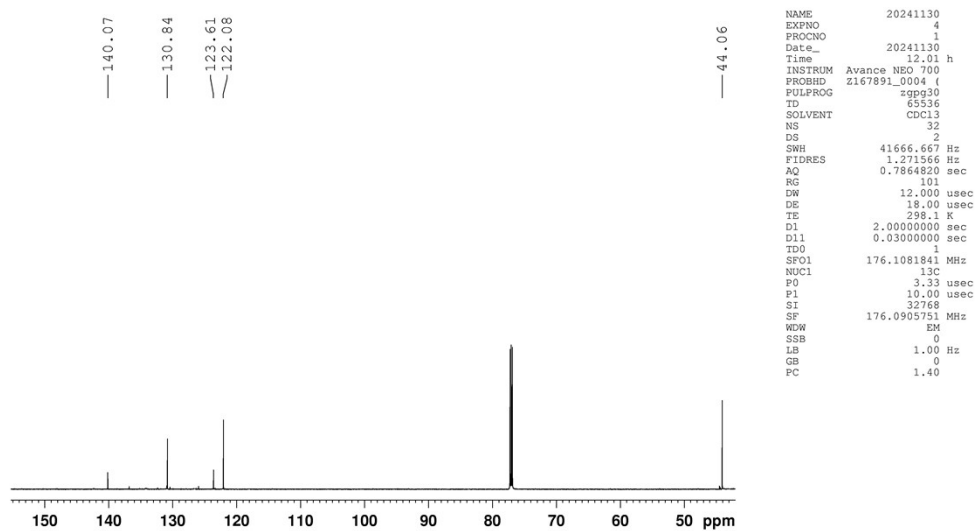

3  
4

Fig. S36 <sup>13</sup>C NMR of 4-bromophenyl methyl sulfoxide

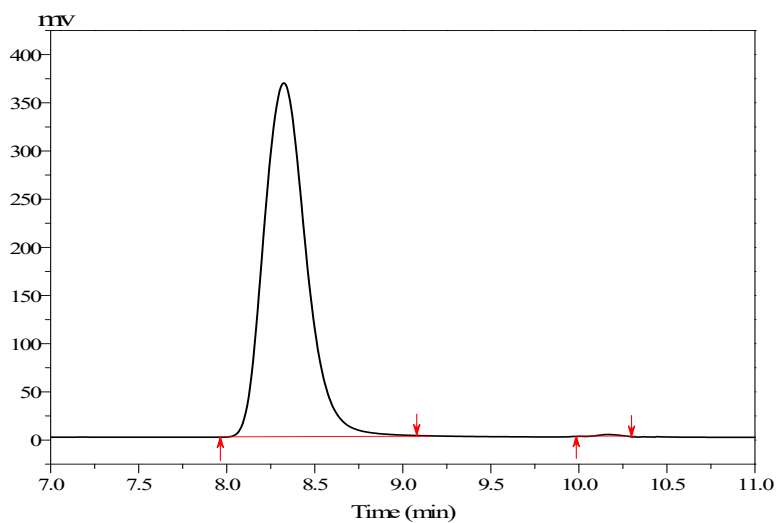

5

1 **Fig. S37** HPLC of 4-bromophenyl methyl sulfoxide obtained over *IL-Ti(salen)* CMOF-1 (ee  
2 value 99%)

3 *4-Nitrophenyl methyl sulfoxide*: The crude product was purified by chromatography on silica gel  
4 (petroleum ether/ethyl acetate, 5: 1). The product has been identified by <sup>1</sup>H and <sup>13</sup>C NMR spectrum  
5 (see Fig. S38 and 39). <sup>1</sup>H NMR (CDCl<sub>3</sub>, 500 MHz): δ (ppm): 8.44-7.86 (m, 4 H, ArH), 2.83 (s, 3 H,  
6 -SCH<sub>3</sub>). <sup>13</sup>C NMR (CDCl<sub>3</sub>, 500 MHz) δ (ppm): 148.80, 147.30, 122.80, 44.06. ee was determined  
7 by HPLC (*i*-PrOH/*n*-hexane = 3:7 (v/v)); flow rate = 1.0 mL·min<sup>-1</sup>; 25 °C; λ = 254 nm; major  
8 enantiomer *t*<sub>R</sub> = 5.48 min and minor enantiomer *t*<sub>S</sub> = 10.05 min (see Fig. S40).

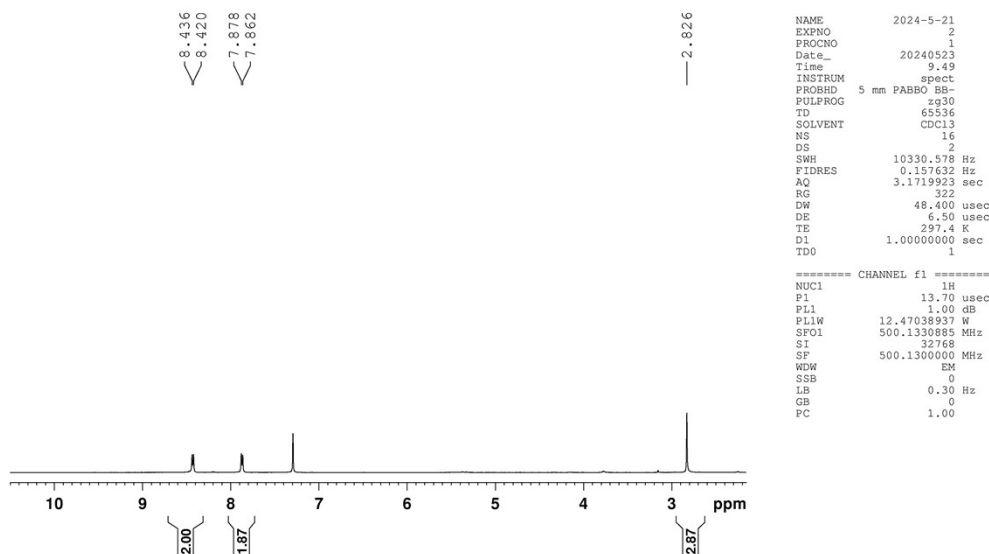

9  
10

**Fig. S38** <sup>1</sup>H NMR of 4-nitrophenyl methyl sulfoxide

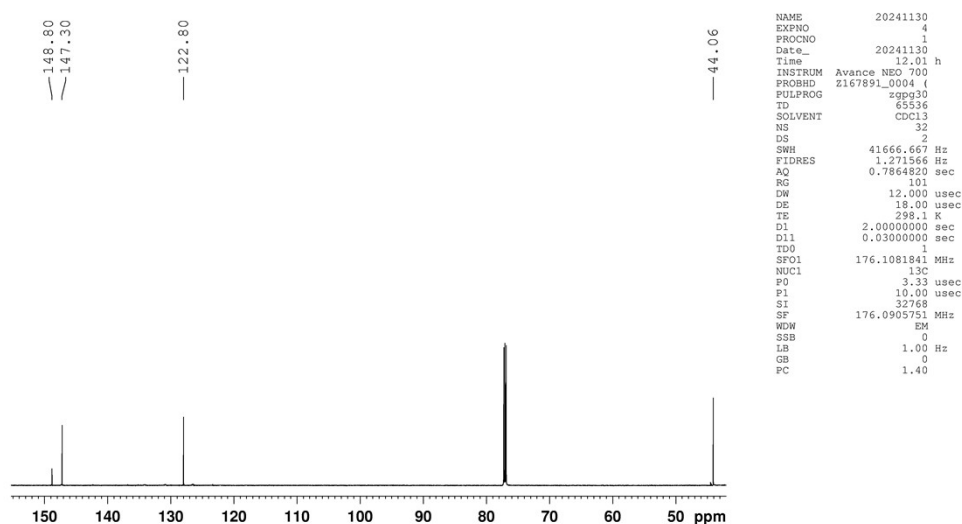

11  
12

**Fig. S39** <sup>13</sup>C NMR of 4-nitrophenyl methyl sulfoxide

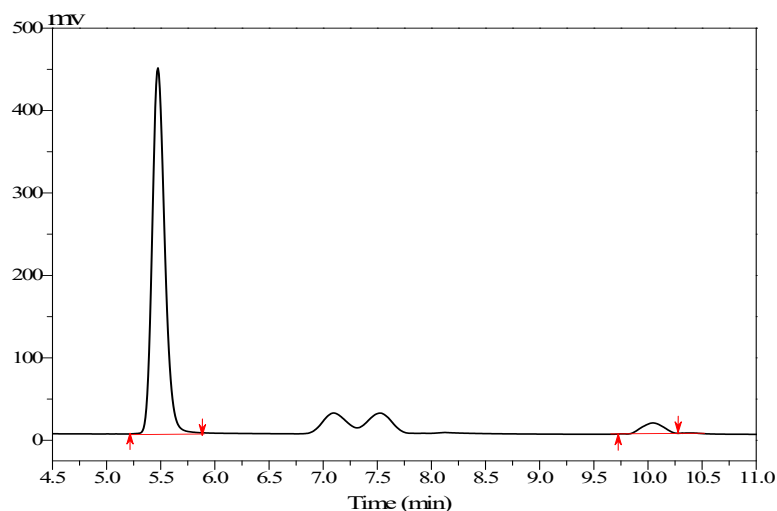

1  
 2 **Fig. S40** HPLC of 4-nitrophenyl methyl sulfoxide obtained over *IL*-Ti(salen) CMOF-1 (ee  
 3 value 90%)  
 4 *Benzyl methyl sulfoxide*: The crude product was purified by chromatography on silica gel  
 5 (petroleum ether/ethyl acetate, 9: 1). The product has been identified by <sup>1</sup>H and <sup>13</sup>C NMR spectrum  
 6 (see Fig. S41 and 42). <sup>1</sup>H NMR (CDCl<sub>3</sub>, 500 MHz): δ (ppm): 7.44 (m, 5 H, ArH), 4.28 (s, 2 H, Ar-  
 7 CH<sub>2</sub>), 2.78 (s, 3 H, SCH<sub>3</sub>). <sup>13</sup>C NMR (CDCl<sub>3</sub>, 500 MHz) δ (ppm): 130.52, 129.18, 128.32, 61.37,  
 8 39.01. ee was determined by HPLC (*i*-PrOH/n-hexane = 1:9 (v/v)); flow rate = 1.3 mL·min<sup>-1</sup>; 25  
 9 °C; λ = 254 nm; major enantiomer *t<sub>R</sub>* = 13.44 min and minor enantiomer *t<sub>S</sub>* = 24.09 min (see Fig.  
 10 S43).

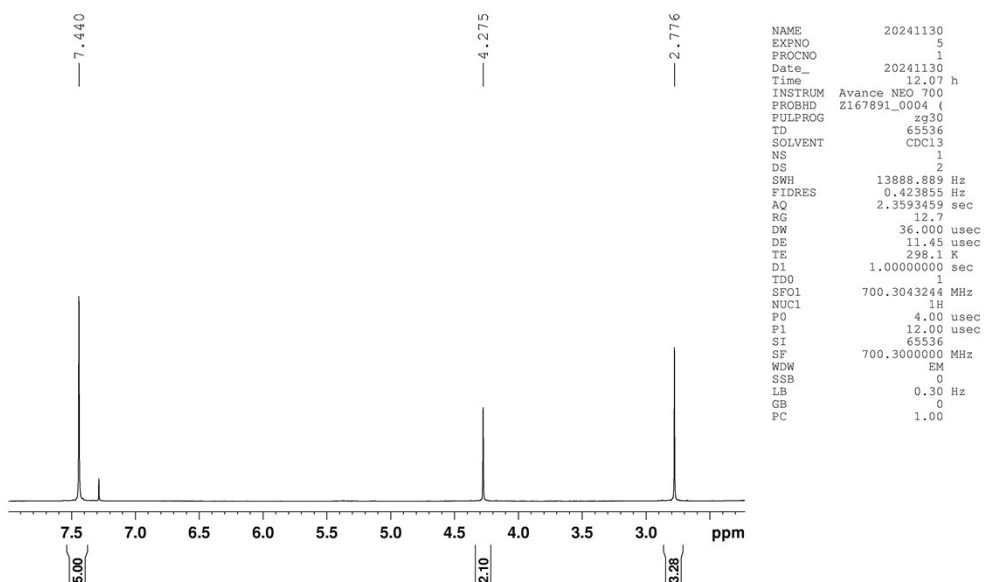

11  
 12 **Fig. S41** <sup>1</sup>H NMR of benzyl methyl sulfoxide

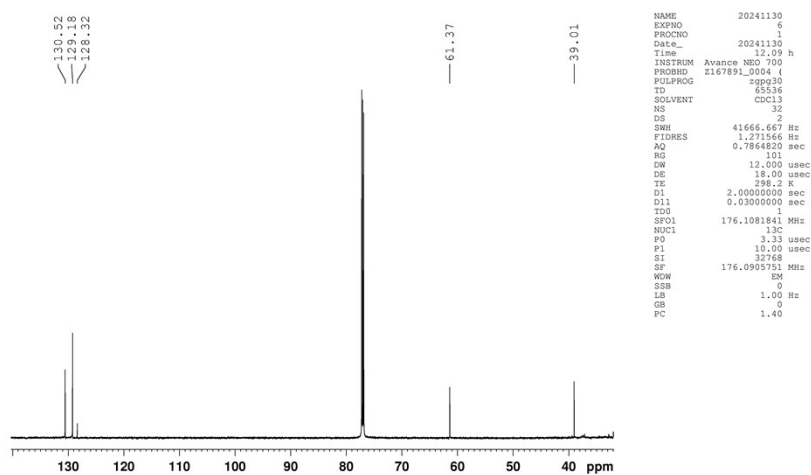

1

2

**Fig. S42**  $^{13}\text{C}$  NMR of benzyl methyl sulfoxide

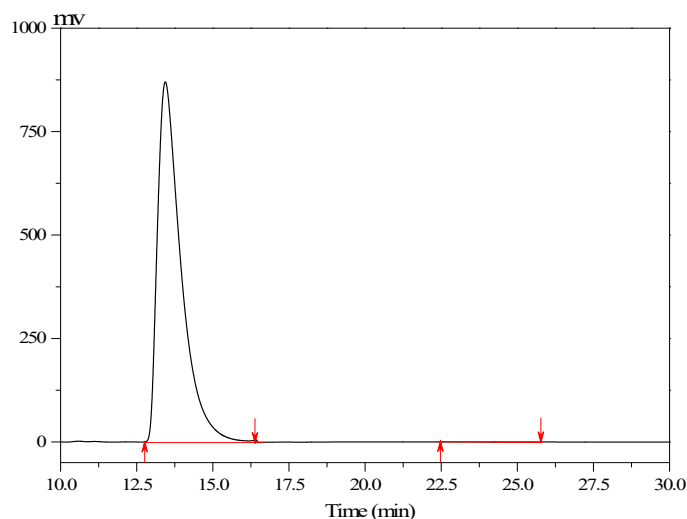

3

4

**Fig. S43** HPLC of benzyl methyl sulfoxide obtained over *IL*-Ti(salen) CMOF-1 (ee value >99%)

5

6 *Phenyl vinyl sulfoxide*: The crude product was purified by chromatography on silica gel  
 7 (petroleum ether/ethyl acetate, 5: 1). The product has been identified by  $^1\text{H}$  and  $^{13}\text{C}$  NMR spectrum  
 8 (see Fig. S44 and 45).  $^1\text{H}$  NMR ( $\text{CDCl}_3$ , 500 MHz):  $\delta$  (ppm): 7.57-7.52 (m, 5 H, ArH), 6.71-6.61  
 9 (m, 1 H, -SCH=CH<sub>2</sub>), 6.25-6.22 and 5.93-5.92 (m, 2 H, -SCH=CH<sub>2</sub>).  $^{13}\text{C}$  NMR ( $\text{CDCl}_3$ , 500 MHz)  
 10  $\delta$  (ppm): 143.01, 129.49, 129.37, 127.95, 124.69, 120.74. ee was determined by HPLC (*i*-PrOH/  
 11 hexane = 1:9 (v/v)); flow rate = 1.0 mL·min<sup>-1</sup>; 25 °C;  $\lambda$  = 254 nm; major enantiomer  $t_R$  = 18.65 min  
 12 and minor enantiomer  $t_S$  = 21.93 min (see Fig. S46).



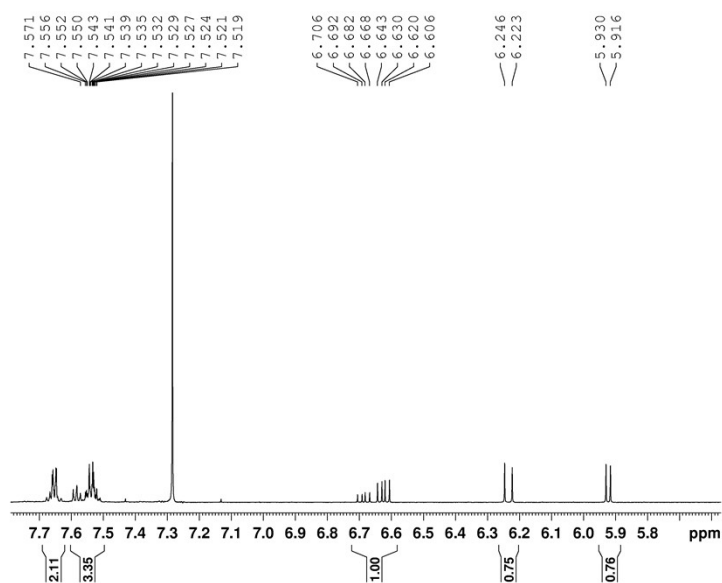

```

NAME      20241201
EXPNO    3
PROCNO   1
Date_    20241201
Time     19.36 h
INSTRUM  Avance NEO 700
PROBHD   2167891_0004 (
PULPROG  zg30
TD       65536
SOLVENT  CDCl3
NS       1
DS       2
SWH      13888.889 Hz
FIDRES   0.423855 Hz
AQ       2.3593459 sec
RG       16
DW       36.000 usec
DE       11.45 usec
TE       298.0 K
D1       1.0000000 sec
TD0      1
SF01     700.3043244 MHz
NUC1     1H
P0       4.00 usec
P1       12.00 usec
SI       65536
SF       700.3000000 MHz
WDW      EM
SSB      0
LB       0.30 Hz
GB       0
PC       1.00

```

1  
2

Fig. S44 <sup>1</sup>H NMR of phenyl vinyl sulfoxide

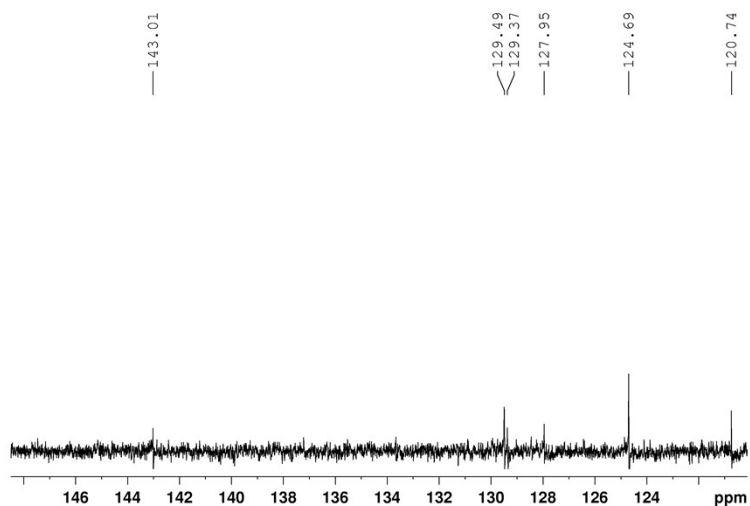

```

NAME      20241201
EXPNO    4
PROCNO   1
Date_    20241201
Time     19.39 h
INSTRUM  Avance NEO 700
PROBHD   2167891_0004 (
PULPROG  zgpg30
TD       65536
SOLVENT  CDCl3
NS       32
DS       2
SWH      41666.667 Hz
FIDRES   1.271566 Hz
AQ       0.7864820 sec
RG       101
DW       12.000 usec
DE       18.00 usec
TE       298.0 K
D1       2.0000000 sec
D11      0.0300000 sec
TD0      1
SF01     176.1081841 MHz
NUC1     13C
P0       3.10 usec
P1       9.29 usec
SI       32768
SF       176.0905751 MHz
WDW      EM
SSB      0
LB       1.00 Hz
GB       0
PC       1.40

```

3  
4

Fig. S45 <sup>13</sup>C NMR of phenyl vinyl sulfoxide

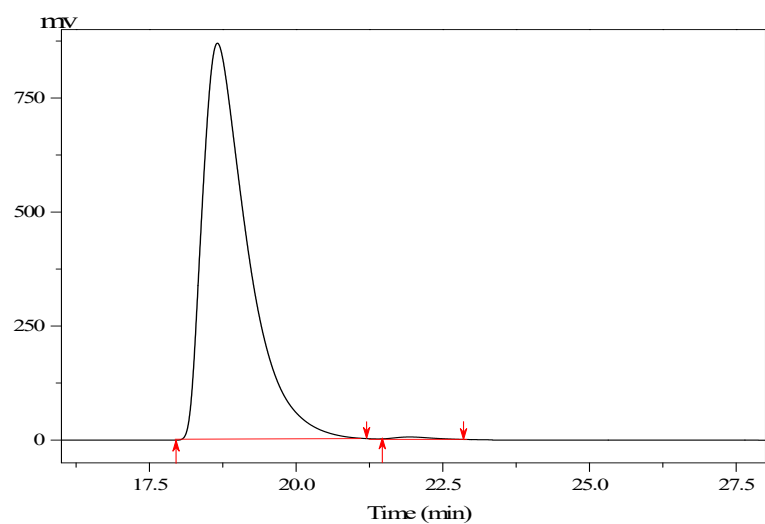

1

2 **Fig. S46** HPLC of phenyl vinyl sulfoxide obtained over *IL*-Ti(salen) CMOF-1 (ee value 99%)

3 **References**

4 1 Y. Zhang, R. Tan, M. Gao, P. Hao, D. Yin, *Green Chem.*, 2017, **19**, 1182-1193.

5 2 S. Lirio, Y. Shih, P. B. So, L. Liu, Y. Yen, S. Furukawa, W. Liu, H. Huang, C.Lin, *Dalton Trans.*

6 2021, **50**, 1866-1873.
